# Supplementary material
Source: publisher site journal article supplement (https://www.dovepress.com/article/388297)
Supplement: Supplementary file 1 [file get_supplementary_file.php]

**Supplementary Information**

**Methods**

***Sputum Induction and Analysis***

Spirometery (Medgraphics, CPFS/D USB™ Spirometer; BreezeSuite v7.1, Saint Paul, MN, USA) and sputum induction with hypertonic saline (4.5%) were performed as previously described. For inflammatory cell counts, selected sputum was dispersed using dithiothreitol (DTT). The suspension was filtered, and a total cell count of leucocytes and cell viability was performed. Cytospins were prepared, stained (May-Grunwald Giemsa) and a differential cell count obtained from 400 non-squamous cells. For gene expression microarray analysis, 100 mL selected sputumwas added to Buffer RLT (Qiagen, Hilden, Germany) and stored at –80οC until RNA extraction.

***Statistical Analysis***

Microarray data was exported using Genome Studio (Illumina, San Diego,USA) and analysed using GeneSpring GX11 (Agilent Technologies, Santa Clara, USA). Probe-centered data were log transformed, normalised and baseline converted to the median of all samples. Data were filtered (47,231) and only genes flagged as present (<0.05 detection p value) in 50% of samples were included in further analysis (23,337). Differential gene expression was determined using unpaired T-test for 2 group comparisons of normally distributed data or analysis of variance (ANOVA) for multiple group comparison with Tukey post hoc testing (p<0.05 adjusted for multiple comparisons using Benjamini Hochberg false discovery rate (FDR) correction). Hierarchical clustering was performed using the Euclidean similarity measure, with the linkage rule of Ward’s linkage. Cellular pathways (Legacy) that were overrepresented in the differentially expressed gene lists were determined using GeneSpring GX14.9.1 where pathways of significance were determined by an adjusted p<0.05 as well as 5 or more genes present in the differentially expressed gene list. The Search Tool for the Retrieval of Interacting Genes (STRING: http://string-db.org/) database v11 was used to investigate protein-protein interactions between differentially expressed genes. A minimum required interaction score of high confidence (>0.9) was applied and only the 1st shell query proteins were included in the analysis for the maximum number of interactions. The network edges were marked as confidence where the line thickness indicates the strength of the data support. Disconnected nodes were removed from the analysis, as were single interactions (one interaction between 2 proteins).

**Results**

***Differential gene expression between COPD and Healthy***

8,531 entities were differentially expressed between COPD and healthy controls, with 1348 entities that were ≥ 2 fold change (790 upregulated and 558 downregulated, and corresponding to 32 GO terms) (Tables S1 and S2 below). Pathway analysis showed that entities in the TNF alpha/ nuclear factor-kB (NF-kB) (p=0.008, 12/188 (6.4%) entities altered), T-cell receptor (TCR) (p=0.027, 8/127 (6.3%) entities altered) and transforming growth factor beta receptor (TGFBR) (p=0.042, 8/137 (5.8%) entities altered) were overrepresented.

**Summary of ECLIPSE (GSE22148) cohort**

The ECLIPSE data set GSE221481 consists of 148 ex-smokers with GOLD stage 2-4 COPD (GOLD stage 2, n=74 and GOLD stage 3 and 4, n=74). GOLD stage 2 and stage 3 and 4 participants were matched for age (65 and 64 years, respectively) and gender (65% and 68% males, respectively) and had comparable smoking history (pack years of 48 and 49, respectively). A linear model analysis of variance adjusted for age, gender and batch was used to compare microarray gene expression between GOLD stage 3 and 4 against GOLD stage 2. A significant difference between groups was defined as a fold-change (FC) >±2 (expressed as severe COPD

relative to moderate COPD) and p-value <0.01.

**Table S1 Top 100 differentially expressed genes between COPD and Healthy controls (with ≥ 2 fold change) [50 downregulated, 50 upregulated]**

| **Symbol** | **Fold change** | **Regulation** | **Definition** |
| --- | --- | --- | --- |
| RAB3IP | 4.9 | up | RAB3A interacting protein (rabin3) (RAB3IP), transcript variant A. |
| MIR1974 | 4.9 | up | microRNA 1974 (MIR1974) |
| TFIP11 | 4.7 | up | tuftelin interacting protein 11 (TFIP11), transcript variant 1. |
| FAM153B | 4.5 | up | family with sequence similarity 153, member B (FAM153B). |
| DKFZp434K191 | 4.5 | up | hypothetical protein DKFZp434K191 (DKFZp434K191). |
| PPP2R3A | 4.5 | up | protein phosphatase 2 (formerly 2A), regulatory subunit B'', alpha (PPP2R3A), transcript variant 2. |
| RNF213 | 4.4 | up | ring finger protein 213 (RNF213), transcript variant 2. |
| ZNF860 | 4.3 | up | zinc finger protein 860 (ZNF860). XM_001725699 XM_496634 |
| ALS2CR14 | 4.1 | up | amyotrophic lateral sclerosis 2 (juvenile) chromosome region, candidate 14 (ALS2CR14). |
| ZNF773 | 4.1 | up | zinc finger protein 773 (ZNF773). |
| PCDHB9 | 4.1 | up | protocadherin beta 9 (PCDHB9). |
| LOC441268 | 4.0 | up | hypothetical gene supported by BC044942 (LOC441268). |
| ERVWE1 | 4.0 | up | endogenous retroviral family W, env(C7), member 1 (ERVWE1), transcript variant 1. |
| FLJ34047 | 4.0 | up | hypothetical protein FLJ34047 (FLJ34047). |
| FLJ45337 | 4.0 | up | FLJ45337 protein (FLJ45337). |
| RAD51 | 4.0 | up | RAD51 homolog (RecA homolog, E. coli) (S. cerevisiae) (RAD51), transcript variant 2. |
| ZNF626 | 4.0 | up | zinc finger protein 626 (ZNF626), transcript variant 1. |
| LOC389517 | 4.0 | up | Williams Beuren syndrome chromosome region 19 pseudogene (LOC389517) on chromosome 7. |
| TMEM156 | 3.9 | up | transmembrane protein 156 (TMEM156). |
| MIR2116 | 3.9 | up | microRNA 2116 (MIR2116), microRNA. |
| CAMK2B | 3.9 | up | calcium/calmodulin-dependent protein kinase (CaM kinase) II beta (CAMK2B), transcript variant 4. |
| TTN | 3.9 | up | titin (TTN), transcript variant N2-B. |
| ERGIC1 | 3.8 | up | endoplasmic reticulum-golgi intermediate compartment (ERGIC) 1 (ERGIC1), transcript variant 2. |
| CES2 | 3.8 | up | carboxylesterase 2 (intestine, liver) (CES2), transcript variant 1. |
| ZNF93 | 3.8 | up | zinc finger protein 93 (HTF34) (ZNF93), transcript variant 2. |
| BMP8B | 3.8 | up | bone morphogenetic protein 8b (BMP8B). |
| IPP | 3.8 | up | intracisternal A particle-promoted polypeptide (IPP). |
| GSDMB | 3.8 | up | gasdermin B (GSDMB), transcript variant 2. |
| E2F6 | 3.7 | up | E2F transcription factor 6 (E2F6). |
| LOC440157 | 3.7 | up | hypothetical gene supported by AK096951; BC066547 (LOC440157). |
| RBM3 | 3.7 | up | RNA binding motif (RNP1, RRM) protein 3 (RBM3), transcript variant 2. |
| ANKRD44 | 3.7 | up | ankyrin repeat domain 44 (ANKRD44). |
| RASSF6 | 3.7 | up | Ras association (RalGDS/AF-6) domain family member 6 (RASSF6), transcript variant 1. |
| C7orf38 | 3.7 | up | chromosome 7 open reading frame 38 (C7orf38). |
| KIAA0408 | 3.7 | up | KIAA0408 (KIAA0408). |
| LIN52 | 3.7 | up | lin-52 homolog (C. elegans) (LIN52). |
| GCLM | 3.6 | up | glutamate-cysteine ligase, modifier subunit (GCLM). |
| CLDN14 | 3.6 | up | claudin 14 (CLDN14), transcript variant 2. |
| ZNF557 | 3.6 | up | zinc finger protein 557 (ZNF557), transcript variant 2. |
| GRM3 | 3.6 | up | glutamate receptor, metabotropic 3 (GRM3). |
| PPP2R2B | 3.6 | up | protein phosphatase 2 (formerly 2A), regulatory subunit B, beta isoform (PPP2R2B), transcript variant 5. |
| SPC24 | 3.6 | up | SPC24, NDC80 kinetochore complex component, homolog (S. cerevisiae) (SPC24). |
| ZNF600 | 3.6 | up | zinc finger protein 600 (ZNF600). |
| PLA2G2D | 3.6 | up | phospholipase A2, group IID (PLA2G2D). |
| COX19 | 3.6 | up | COX19 cytochrome c oxidase assembly homolog (S. cerevisiae) (COX19). |
| RUNDC2C | 3.6 | up | RUN domain containing 2C (RUNDC2C), non-coding RNA. |
| DCLRE1C | 3.6 | up | DNA cross-link repair 1C (PSO2 homolog, S. cerevisiae) (DCLRE1C), transcript variant b. |
| WDR74 | 3.6 | up | WD repeat domain 74 (WDR74). |
| PCDHB19P | 3.5 | up | protocadherin beta 19 pseudogene (PCDHB19P), non-coding RNA. |
| RAX2 | 3.5 | up | retina and anterior neural fold homeobox 2 (RAX2). |
| TGM2 | -4.3 | down | transglutaminase 2 (C polypeptide, protein-glutamine-gamma-glutamyltransferase)  (TGM2), transcript variant 1. |
| FABP4 | -4.0 | down | fatty acid binding protein 4, adipocyte (FABP4). |
| SCGB1A1 | -3.7 | down | secretoglobin, family 1A, member 1 (uteroglobin) (SCGB1A1). |
| FAM82A2 | -3.7 | down | family with sequence similarity 82, member A2 (FAM82A2). |
| ABCG1 | -3.5 | down | ATP-binding cassette, sub-family G (WHITE), member 1 (ABCG1), transcript variant 2. |
| SCGB3A1 | -3.4 | down | secretoglobin, family 3A, member 1 (SCGB3A1). |
| KCNAB1 | -3.2 | down | potassium voltage-gated channel, shaker-related subfamily, beta member 1 (KCNAB1), transcript variant 2. |
| AKR1A1 | -3.2 | down | aldo-keto reductase family 1, member A1 (aldehyde reductase) (AKR1A1), transcript variant 2. |
| EGR2 | -3.1 | down | early growth response 2 (Krox-20 homolog, Drosophila) (EGR2). |
| SCD | -3.1 | down | stearoyl-CoA desaturase (delta-9-desaturase) (SCD). |
| CXCR7 | -3.1 | down | chemokine (C-X-C motif) receptor 7 (CXCR7). |
| ATP1B1 | -3.1 | down | ATPase, Na+/K+ transporting, beta 1 polypeptide (ATP1B1), transcript variant 1. |
| CPVL | -3.1 | down | carboxypeptidase, vitellogenic-like (CPVL), transcript variant 1. |
| ALDH2 | -3.0 | down | aldehyde dehydrogenase 2 family (mitochondrial) (ALDH2), nuclear gene encoding mitochondrial protein. |
| CD36 | -3.0 | down | CD36 molecule (thrombospondin receptor) (CD36), transcript variant 3. |
| CTSC | -3.0 | down | cathepsin C (CTSC), transcript variant 1. |
| LGALS3BP | -3.0 | down | lectin, galactoside-binding, soluble, 3 binding protein (LGALS3BP). |
| RAB7B | -3.0 | down | RAB7B, member RAS oncogene family (RAB7B). |
| ALDH1A1 | -3.0 | down | aldehyde dehydrogenase 1 family, member A1 (ALDH1A1). |
| TCEA3 | -3.0 | down | transcription elongation factor A (SII), 3 (TCEA3). |
| ATP5H | -2.9 | down | ATP synthase, H+ transporting, mitochondrial F0 complex, subunit d (ATP5H),  nuclear gene encoding mitochondrial protein, transcript variant 1. |
| CPE | -2.9 | down | carboxypeptidase E (CPE). |
| LIPA | -2.9 | down | lipase A, lysosomal acid, cholesterol esterase (LIPA), transcript variant 2. |
| MGST3 | -2.9 | down | microsomal glutathione S-transferase 3 (MGST3). |
| NDUFA4 | -2.9 | down | NADH dehydrogenase (ubiquinone) 1 alpha subcomplex,  4, 9kDa (NDUFA4), nuclear gene encoding mitochondrial protein. |
| CES1 | -2.9 | down | carboxylesterase 1 (monocyte/macrophage serine esterase 1) (CES1), transcript variant 1. |
| PPARG | -2.9 | down | peroxisome proliferator-activated receptor gamma (PPARG), transcript variant 1. |
| AGRP | -2.8 | down | agouti related protein homolog (mouse) (AGRP), transcript variant 2. |
| CA2 | -2.8 | down | carbonic anhydrase II (CA2). |
| APOC1 | -2.8 | down | apolipoprotein C-I (APOC1). |
| KIAA1598 | -2.8 | down | KIAA1598 (KIAA1598). |
| CES1 | -2.8 | down | carboxylesterase 1 (monocyte/macrophage serine esterase 1) (CES1), transcript variant 3. |
| SEPT11 | -2.8 | down | septin 11 (SEPT11). |
| HDDC2 | -2.8 | down | HD domain containing 2 (HDDC2). |
| NDUFAB1 | -2.7 | down | NADH dehydrogenase (ubiquinone) 1, alpha/beta subcomplex, 1, 8kDa (NDUFAB1). |
| GPNMB | -2.7 | down | glycoprotein (transmembrane) nmb (GPNMB), transcript variant 1. |
| HLA-DRB3 | -2.7 | down | major histocompatibility complex, class II, DR beta 3 (HLA-DRB3). |
| MS4A7 | -2.7 | down | membrane-spanning 4-domains, subfamily A, member 7 (MS4A7), transcript variant 2. |
| LAP3 | -2.7 | down | leucine aminopeptidase 3 (LAP3). |
| C8B | -2.7 | down | complement component 8, beta polypeptide (C8B). |
| SLC47A1 | -2.7 | down | solute carrier family 47, member 1 (SLC47A1). |
| SSBP1 | -2.7 | down | single-stranded DNA binding protein 1 (SSBP1). |
| LDHB | -2.7 | down | lactate dehydrogenase B (LDHB). |
| CCL23 | -2.7 | down | chemokine (C-C motif) ligand 23 (CCL23), transcript variant CKbeta8. |
| CTSZ | -2.7 | down | cathepsin Z (CTSZ). |
| DGKQ | -2.7 | down | diacylglycerol kinase, theta 110kDa (DGKQ). |
| CPNE3 | -2.7 | down | copine III (CPNE3). |
| GLB1 | -2.7 | down | galactosidase, beta 1 (GLB1), transcript variant 179423. |
| ACO1 | -2.6 | down | aconitase 1, soluble (ACO1). |
| MME | -2.6 | down | membrane metallo-endopeptidase (MME), transcript variant 1. |

**Table S2 Gene ontology categories significantly overrepresented between COPD and Healthy Controls**

| **GOLD stage Gene Ontology**  **(fold change ≥2)** | **Number of genes** | **Adjusted P value** |
| --- | --- | --- |
| **Biological Processes** |  |  |
| *energy coupled proton transport, down electrochemical gradient* | 7 | 0.017 |
| *ATP synthesis coupled proton transport* | 7 | 0.017 |
| *ATP metabolic process* | 17 | 0.036 |
| *organonitrogen compound biosynthetic process* | 64 | 0.045 |
| *purine ribonucleoside monophosphate metabolic process* | 19 | 0.045 |
| *purine nucleoside monophosphate metabolic process* | 19 | 0.045 |
| *drug metabolic process* | 29 | 0.048 |
| *peptide metabolic process* | 36 | 0.049 |
| **Cellular Components** |  |  |
| *cytoplasmic part* | 272 | 5.764E-12 |
| *mitochondrion* | 96 | 1.011E-9 |
| *cytoplasm* | 382 | 4.249E-7 |
| *mitochondrial part* | 59 | 6.486E-7 |
| *mitochondrial envelope* | 46 | 4.382E-6 |
| *organelle envelope* | 58 | 6.468E-6 |
| *envelope* | 58 | 6.468E-6 |
| *Mitochondrial membrane* | 43 | 2.47E-5 |
| *Mitochondrial inner membrane* | 34 | 1.829E-4 |
| *Organelle inner membrane* | 34 | 7.279E-4 |
| *mitochondrial protein complex* | 20 | 0.003 |
| *Intracellular part* | 497 | 0.004 |
| *mitochondrial proton-transporting ATP synthase complex* | 7 | 0.007 |
| *Mitochondrial membrane part* | 17 | 0.01 |
| *organelle membrane* | 78 | 0.017 |
| *intracellular* | 508 | 0.017 |
| *inner mitochondrial membrane protein complex* | 13 | 0.017 |
| *proton-transporting ATP synthase complex* | 7 | 0.017 |
| *membrane-bounded organelle* | 383 | 0.042 |
| *ntracellular membrane-bounded organelle* | 366 | 0.045 |
| *MHC class II protein complex* | 6 | 0.048 |
| **Molecular function** |  |  |
| *proton-transporting ATP synthase activity, rotational mechanism* | 8 | 0.005 |
| *proton-transporting ATPase activity, rotational mechanism* | 8 | 0.05 |
| *ATPase activity, coupled to transmembrane movement of ions, rotational mechanism* | 8 | 0.05 |

**Table S3 Clinical characteristics and sputum cell counts of the transcriptional sub-clusters of COPD**

| ***Parameter*** | ***Sub-cluster 1.1 (n=14)*** | ***Sub-cluster 1.2 (n=21)*** | ***Sub-cluster 2.1 (n=20)*** | ***Sub-cluster 2.2 (n=17)*** | ***p-value*** |
| --- | --- | --- | --- | --- | --- |
| Age | 71 (64, 76) | 68 (63,74) | 69 (64, 75.5) | 70 (66, 80) | 0.560 |
| Gender (female) | 5 (35.7%) | 13 (61.9%) | 8 (40%) | 8 (47.1%) | 0.413 |
| Weight (kg) | 81.1 (73, 87) | 81 (74.3, 96.9) | 83.9(59, 101.5) | 67.7 (59.3, 75) | 0.052 |
| BMI | 28.9 (27.1, 30.3) | 29.2 (27.4, 34.2) | 28.8 (24.1, 37.5) | 24.5 (22.7, 27.6) | 0.054 |
| Smoking history | 11 (78.6%) | 14 (66.7%) | 16 (80%) | 16 (80%) | 0.231 |
| Pack years | 33.7 (13, 89) | 28 (16,42) | 36 (15.1, 88.5) | 38.5 (10.9, 72) | 0.629 |
| FEV1 (L) | 1.5 (1.04, 2.05) | 1.44 (1.3, 1.75)* | 1.21 (1, 1.45) | 0.99 (0.9, 1.38) | 0.020 |
| FEV1%predicted | 56.5 ( 40, 74) | 58 (54, 68) | 49.5 (33, 64.5) | 47 (40, 59) | 0.081 |
| Post b2 FEV1/FVC | 54.4 (41.9, 62.8) | 60.3 (51.3, 65.5) | 53.4 (42.2, 58.1) | 49(37, 55.3) | 0.071 |
| mMRC | 1 (1,3) n=12 | 3 (2,3) n=13 | 3 (1.5, 4) n=16 | 4 (2,4) n=7 | 0.057 |
| GOLD stage |  |  |  |  | 0.011 |
| Stage 1 | 2 (14.3%) | 0 | 2 (10%) | 0 |  |
| Stage 2 | 7 (50%) | 18 (85.7%) | 8 (40%) | 6 (35.3%) |  |
| Stage 3 | 5 (35.7%) | 3 (14.3%) | 9 (45%) | 8 (47.1%) |  |
| Stage 4 | 0 | 0 | 1 (5%) | 2 (11.8%) |  |
| GOLD quadrant | N= 12 | N= 12 | N= 15 | N= 7 | 0.132 |
| Quadrant A | 4 (33.3%) | 2 (16.7%) | 2 (13.3%) | 0 |  |
| Quadrant B | 1 (8.3%) | 6 (50%) | 4 (26.7%) | 0 |  |
| Quadrant C | 3 (25%) | 1 (8.3%) | 2 (13.3%) | 1 (14.3%) |  |
| Quadrant D | 4 (33.3%) | 3 (25%) | 7 (46.7%) | 6 (85.7%) |  |
| Exacerbation pronea | 5 (35.7%) N=14 | 10 (50%) N=20 | 10 (52.6%) N=19 | 7 (41.2%) | 0.759 |
| BODE | 3 (0, 4) n= 11 | 3 (2,5) n=13 | 4.5 (2,6) n=16 | 6 (0, 6) n=7 | 0.221 |
| SGRQ | 46.8 (35.6, 69) n=13 | 33.7 (22.9, 51) n=20 | 49.9 (43, 68.4) n=17 | 41.2 (19.2, 63) n= 13 | 0.080 |
| CCI | 4 (3,5) | 4 (3,4) | 4 (3,5) | 4 (4,5) | 0.601 |
| HADS score | 9 (5,14) n=12 | 10 (6,12) n=13 | 11.5(8, 16.5) n=16 | 7 (6, 19) n=7 | 0.580 |
| ICS use | 12 (85.7%) | 18 (85.7%) | 19 (95%) | 16 (94.1%) | 0.693 |
| ICS total daily doseb | 500 (450,500) | 500 (250, 500) | 500 (500, 500) | 500 (250, 650) | 0.914 |
| Inflammatory phenotype |  |  | N=18 |  | 0.436 |
| Eosinophil | 2 (14.3%) | 4 (19%) | 2 (11.1%) | 4 (23.5%) |  |
| Neutrophil | 2 (14.3%) | 1 (4.8%) | 1 (5.6%) | 3 (17.7%) |  |
| Mixed | 3 (21.4%) | 9 (42.9%) | 11 (61.1%) | 7 (41.2%) |  |
| Pauci | 7(50%) | 7 (33.3%) | 4 (22.2%) | 3 (17.7%) |  |
| Neutrophillic | 5 (35.7%) | 10 (47.6%) | 12 (66.7%)  n=18 | 10 (58.8%) | 0.334 |
| Eosinophillic | 4 (28.6%) | 5 (23.8%) | 3 (16.7%) n=18 | 7 (41.2%) | 0.434 |
| Mixed | 2 (14.3%) | 1 (4.8%) | 1 (5.6%) n=18 | 3 (17.7%) | 0.543 |
| Systemic inflammation | 4 (36.4%), n=11 | 10 (52.6%), n=19 | 13 (68.4%) n=19 | 8 (53.3%) n=15 | 0.398 |
| Neutrophil % | 48.1 (33.5, 71) | 60.8 (46, 80.5) | 74 (46.5, 88.3)  n=18 | 64.3 (55, 80.3) | 0.125 |
| Eosinophil % | 1.1 (0.5, 3.3) | 1.3 (0.8, 2.8) | 1.6 (0.7, 2.0), n=18 | 2 (1.3, 6.5) | 0.496 |
| Neutrophil count x106 | 1.4 (0.6, 6.2) | 2.7 (1.7, 4.2) | 4.7 (1, 8.2) n=17 | 3.8 (1.8, 5.8) | 0.290 |
| Eosinophil count x106 | 0.06 (0.01, 0.2) | 0.07 (0.03, 0.17) | 0.09 (0.05, 0.2) n=17 | 0.13 (0.02, 0.7) | 0.603 |
| TCC | 3.4 (2.1, 12.5) | 5.1 (3.1, 7.7) | 6.6(3.7, 9.9) n=17 | 7.1(3.2, 11.4) | 0.723 |
| CRP | 3 (1.4, 7) n=11 | 3.15 (1.7, 8.2) n=18 | 6.5 (2.8, 20.9) n=17 | 3 (1.1, 8.6) n=15 | 0.300 |
| ***Comorbidities*** |  |  |  |  |  |
| Other resp | 8 (57.1%) | 4 (19%) | 12 (60%) | 7 (41.2%) | 0.470 |
| Cardio | 13 (92.9%)** | 12 (57.1%) | 10 (50%) | 9 (52.9%) | 0.041 |
| Gastro | 9 (64.3%) | 8 (38.1%) | 8 (40%) | 6 (35.3%) | 0.373 |
| Metabolic | 9 (64.3%) | 8 (38.1%) | 11 (55%) | 8 (47.1%) | 0.490 |
| Musculoskeletal | 5 (35.7%) | 13 (61.9%) | 7 (35%) | 6 (35.3%) | 0.247 |
| Cancer | 5 (35.7%) | 3 (14.3%) | 4 (20%) | 3 (17.6%) | 0.532 |
| Psychiatric | 4 (28.6%) | 6 (28.6%) | 5 (25%) | 3 (17.6%) | 0.873 |
| Hepatic | 1 (7.1%) | 2 (9.5%) | 2 (10%) | 0 | 0.668 |
| Neurological | 2 (14.3%) | 2 (9.5%) | 1 (5%) | 0 | 0.499 |
| Blood diseases | 2 (14.3%) | 3 (14.3%) | 3 (15%) | 0 | 0.351 |
| Urology | 2 (14.3%) | 4 (19%) | 2 (10%) | 3 (17.6%) | 0.890 |
| Eye diseases | 1 (7.1%) | 5 (23.8%) | 6 (30%) | 7 (41.2%) | 0.188 |
| Skin conditions | 2 (14.3%) | 3 (14.3%) | 3 (15%) | 2 (11.8%) | 1.000 |
| Reproductive condition | 0 | 2 (9.5%) | 0 | 3 (17.6%) | 0.128 |
| Venous diseases | 0 | 0 | 1 (5%) | 0 | 0.708 |

**Note**: aExacerbation prone: ≥2 exacerbations in the previous year; bICS dose calculated as beclomethasone equivalents where 1 μg of beclomethasone =1 μg budesonide =0.5 μg fluticasone.

Results are reported as mean ± standard deviation (SD) for normally distributed data and as median and interquartile range for nonparametric data. Comparisons between multiple groups were assessed using Kruskal Wallis for non-parametric data. Comparison of categorical data was done using Fisher’s exact test. *kwallis2 p= 0.002 vs Sub-cluster 2.2 **Fischers exact test p<0.013 versus Sub-clusters 1.2, 2.1 and 2.2

**Abbreviations**: BMI, body mass index; FEV1, forced expiratory volume in 1 second; FVC, forced vital capacity; mMRC, modified Medical Research Council; GOLD, Global Initiative for Chronic Obstructive Lung Disease; BODE, body mass index, airflow obstruction, dyspnea, exercise capacity; SGRQ, St George Respiratory Questionnaire; CCI, Charlson Comorbidity Index; HADS, Hospital Anxiety and Depression Scale; ICS, inhaled corticosteroids; CRP, C-reactive protein; SD, standard deviation

**Table S4 Differentially expressed genes between the two GOLD stage groupings**

| **Gene Symbol** | **Gene name** | **Accession** | **Overall p-value** | **Fold change GOLD 3&4 vs  GOLD 2&1** |
| --- | --- | --- | --- | --- |
| **Upregulated** |
| FUT6 | fucosyltransferase 6 | NM_000150.2 | 0.017 | 3.41 |
| RASSF6 | Ras association (RalGDS/AF-6) domain family member 6 | NM_177532.3 | 0.018 | 3.23 |
| CES2* | carboxylesterase 2 (intestine, liver) | NM_003869.4 | 0.021 | 3.05 |
| RHBDL2* | rhomboid like 2 | NM_017821.3 | 0.020 | 3.04 |
| KIAA0408 | KIAA0408 | NM_014702.3 | 0.018 | 3.04 |
| GDPD1* | glycerophosphodiester phosphodiesterase domain containing 1 | NM_182569.1 | 0.017 | 3.04 |
| ZNF626* | zinc finger protein 626 | NM_001076675.1 | 0.023 | 3.00 |
| HEATR3* | HEAT repeat containing 3 | NM_182922.2 | 0.023 | 2.99 |
| KCNK6* | potassium channel, subfamily K, member 6 | NM_004823.1 | 0.021 | 2.97 |
| MYO3B | myosin IIIB | NM_138995.1 | 0.017 | 2.97 |
| MBTD1* | mbt domain containing 1 | NM_017643.1 | 0.016 | 2.94 |
| ERGIC1* | endoplasmic reticulum-golgi intermediate compartment 1 | NM_020462.1 | 0.022 | 2.93 |
| PHAX* | phosphorylated adaptor for RNA export | NM_032177.2 | 0.020 | 2.92 |
| ZNF860 | zinc finger protein 860 | NM_001137674.1 | 0.020 | 2.92 |
| ANKRD44* | ankyrin repeat domain 44 | NM_153697.1 | 0.022 | 2.90 |
| GCLM* | glutamate-cysteine ligase, modifier subunit | NM_002061.2 | 0.021 | 2.89 |
| IPP | intracisternal A particle-promoted polypeptide | NM_005897.1 | 0.023 | 2.86 |
| RAB3IP* | RAB3A interacting protein (rabin3) | NM_001024647.2 | 0.018 | 2.86 |
| SLC5A8 | solute carrier family 5, member 8 | NM_145913.2 | 0.017 | 2.85 |
| MBOAT2* | membrane bound O-acyltransferase domain containing 2 | NM_138799.2 | 0.021 | 2.85 |
| GOLGA9P | golgi autoantigen, golgin subfamily a, 9 pseudogene | NR_024074.1 | 0.021 | 2.84 |
| PRRG4 | Proline rich and Gla domain 4 | NM_024081.4 | 0.017 | 2.81 |
| C11orf63* | chromosome 11 open reading frame 63 | NM_199124.1 | 0.018 | 2.75 |
| C3orf50 | chromosome 3 open reading frame 50 | NR_021485.1 | 0.024 | 2.74 |
| C6orf225 | chromosome 6 open reading frame 225 | NM_001033564.1 | 0.026 | 2.74 |
| C1orf110 | chromosome 1 open reading frame 110 | NM_178550.3 | 0.026 | 2.71 |
| MAFF* | v-maf musculoaponeurotic fibrosarcoma oncogene homolog F | NM_012323.2 | 0.020 | 2.70 |
| RUNDC2C | RUN domain containing 2C | NR_002939.2 | 0.021 | 2.70 |
| GALNT3 | polypeptide N-acetylgalactosaminyltransferase 3 | NM_004482.2 | 0.020 | 2.70 |
| FKBP1P1 | FK506 binding protein 1 pseudogene 1 | NR_024162.1 | 0.025 | 2.69 |
| ZNF773 | zinc finger protein 773 | NM_198542.1 | 0.027 | 2.68 |
| TDRD1 | tudor domain containing 1 | NM_198795.1 | 0.017 | 2.67 |
| SMCR5 | Smith-Magenis syndrome chromosome region, candidate 5 | NR_024007.1 | 0.018 | 2.67 |
| LAX1 | lymphocyte transmembrane adaptor 1 | NM_017773.2 | 0.015 | 2.67 |
| CAMK2B* | calcium/calmodulin-dependent protein kinase II beta | NM_172080.1 | 0.022 | 2.65 |
| POLR2J4* | RNA polymerase II subunit J4, pseudogene | NR_003655.1 | 0.023 | 2.64 |
| ZNF669* | zinc finger protein 669 | NM_024804.1 | 0.019 | 2.63 |
| PPM1K | protein phosphatase 1K | NM_152542.2 | 0.018 | 2.63 |
| TRIM13* | tripartite motif-containing 13 | NM_001007278.1 | 0.018 | 2.61 |
| WDR74* | WD repeat domain 74 | NM_018093.1 | 0.021 | 2.61 |
| CACYBP* | calcyclin binding protein | NM_014412.2 | 0.029 | 2.61 |
| ERVWE1 | endogenous retrovirus group W member 1, envelope | NM_014590.3 | 0.025 | 2.59 |
| GSDMB | gasdermin B | NM_018530.2 | 0.027 | 2.59 |
| GRM3 | glutamate receptor, metabotropic 3 | NM_000840.2 | 0.026 | 2.59 |
| BMP8B* | bone morphogenetic protein 8b | NM_001720.3 | 0.030 | 2.59 |
| LIN52* | Lin-52 DREAM MuvB core complex component | NM_001024674.1 | 0.023 | 2.58 |
| ATP6V1B1 | ATPase, H+ transporting, lysosomal 56/58kDa, V1 subunit B1 | NM_001692.3 | 0.023 | 2.57 |
| DCLRE1C | DNA cross-link repair 1C | NM_001033858.1 | 0.026 | 2.57 |
| RN5S9 | RNA, 5S ribosomal 9 | NR_023371.1 | 0.018 | 2.56 |
| TNFSF15* | TNF superfamily member 15 | NM_005118.2 | 0.021 | 2.55 |
| C7orf38 | chromosome 7 open reading frame 38 | NM_145111.2 | 0.029 | 2.55 |
| ZNF557 | zinc finger protein 557 | NM_001044387.1 | 0.021 | 2.54 |
| MRP63 | mitochondrial ribosomal protein 63 | NM_024026.4 | 0.023 | 2.54 |
| C6orf170 | chromosome 6 open reading frame 170 | NM_152730.4 | 0.020 | 2.54 |
| ZNF93* | zinc finger protein 93 | NM_001004126.1 | 0.026 | 2.52 |
| SSTR2 | somatostatin receptor 2 | NM_001050.2 | 0.017 | 2.52 |
| PCDHB19P | protocadherin beta 19 pseudogene | NR_001282.1 | 0.024 | 2.52 |
| SLC14A1 | solute carrier family 14, member 1 | NM_015865.1 | 0.032 | 2.52 |
| STAR | steroidogenic acute regulatory protein | NM_001007243.1 | 0.027 | 2.52 |
| MCHR2 | melanin-concentrating hormone receptor 2 | NM_032503.2 | 0.022 | 2.51 |
| RAD51* | RAD51 homolog (RecA homolog, E coli) | NM_133487.1 | 0.027 | 2.51 |
| ATG10* | autophagy related 10 | NM_031482.3 | 0.019 | 2.51 |
| GSTTP2 | glutathione S-transferase theta pseudogene 2 | NR_003082.1 | 0.022 | 2.50 |
| PLA2G2D* | phospholipase A2, group IID | NM_012400.2 | 0.022 | 2.50 |
| ZNF600* | zinc finger protein 600 | NM_198457.1 | 0.029 | 2.50 |
| RUNDC2A | RUN domain containing 2A | NM_032167.2 | 0.021 | 2.50 |
| PIGX | phosphatidylinositol glycan anchor biosynthesis, class X | NM_017861.1 | 0.024 | 2.49 |
| ZNF785 | zinc finger protein 785 | NM_152458.5 | 0.024 | 2.47 |
| PCYOX1* | prenylcysteine oxidase 1 | NM_016297.2 | 0.024 | 2.47 |
| ZNF114 | zinc finger protein 114 | NM_153608.1 | 0.027 | 2.47 |
| RAX2 | retina and anterior neural fold homeobox 2 | NM_032753.3 | 0.028 | 2.47 |
| HSCB* | HscB mitochondrial iron-sulfur cluster cochaperone | NM_172002.3 | 0.021 | 2.47 |
| PLXNA4 | plexin A4 | NM_181775.3 | 0.023 | 2.46 |
| PCDHB9 | protocadherin beta 9 | NM_019119.3 | 0.025 | 2.46 |
| STAG3L3 | stromal antigen 3-like 3 | NM_001013739.2 | 0.014 | 2.46 |
| KLHL28* | kelch-like 28 | NM_017658.3 | 0.018 | 2.44 |
| SPC24* | SPC24 component of NDC80 kinetochore complex | NM_182513.1 | 0.027 | 2.44 |
| COX19 | cytochrome c oxidase assembly factor COX19 | NM_001031617.2 | 0.028 | 2.44 |
| RBM3 | RNA binding motif protein 3 | NM_001017430.1 | 0.027 | 2.44 |
| MSX1 | msh homeobox 1 | NM_002448.3 | 0.030 | 2.44 |
| ZNF160* | zinc finger protein 160 | NM_198893.1 | 0.030 | 2.44 |
| NFYB | nuclear transcription factor Y, beta | NM_006166.3 | 0.026 | 2.43 |
| ALS2CR14 | amyotrophic lateral sclerosis 2 (juvenile) chromosome region, candidate 14 | NM_178231.1 | 0.030 | 2.42 |
| TGFBR3 | transforming growth factor, beta receptor III | NM_003243.2 | 0.021 | 2.41 |
| ZNF468* | zinc finger protein 468 | NM_199132.1 | 0.024 | 2.41 |
| RNY1 | RNA, Ro60-associated Y1 | NR_004391.1 | 0.023 | 2.40 |
| WDR23 | WD repeat domain 23 | NM_025230.3 | 0.027 | 2.39 |
| PPP2R3A* | protein phosphatase 2 regulatory subunit B''alpha | NM_181897.1 | 0.035 | 2.38 |
| SPINT3 | serine peptidase inhibitor, Kunitz type, 3 | NM_006652.1 | 0.022 | 2.38 |
| DNHL1 | dynein heavy chain-like 1 | NM_173645.1 | 0.036 | 2.38 |
| FCGR3A | Fc gamma receptor IIIa | NM_000569.6 | 0.018 | 2.37 |
| RNF213* | ring finger protein 213 | NM_020954.2 | 0.033 | 2.35 |
| OR1J1 | olfactory receptor family 1 subfamily J member 1 | NM_001004451.1 | 0.031 | 2.35 |
| ANKFY1* | ankyrin repeat and FYVE domain containing 1 | NM_020740.2 | 0.019 | 2.34 |
| TFIP11* | tuftelin interacting protein 11 | NM_001008697.1 | 0.039 | 2.34 |
| HECTD2* | HECT domain containing 2 | NM_173497.1 | 0.023 | 2.33 |
| PACAP | proapoptotic caspase adaptor protein | NM_016459.2 | 0.025 | 2.33 |
| NXNL1* | nucleoredoxin-like 1 | NM_138454.1 | 0.031 | 2.33 |
| E2F6 | E2F transcription factor 6 | NM_198256.2 | 0.026 | 2.33 |
| DHX40* | DEAH-box helicase 40 | NM_024612.3 | 0.024 | 2.33 |
| STON1* | stonin 1 | NM_006873.2 | 0.035 | 2.32 |
| UCRC | ubiquinol-cytochrome c reductase complex | NM_013387.3 | 0.026 | 2.32 |
| SPN | sialophorin | NM_001030288.1 | 0.020 | 2.32 |
| UGT2B11 | UDP glucuronosyltransferase family 2 member B11 | NM_001073.1 | 0.032 | 2.31 |
| PRO1853 | mitochondrial dysfunction protein A homolog | NM_144736.3 | 0.027 | 2.31 |
| MFSD11* | major facilitator superfamily domain containing 11 | NM_024311.2 | 0.017 | 2.31 |
| MIR2116 | microRNA 2116 | NR_031750.1 | 0.036 | 2.31 |
| FAM153B | family with sequence similarity 153, member B | NM_001079529.2 | 0.036 | 2.30 |
| CYCSL1 | cytochrome c, somatic-like 1 | NR_001561.1 | 0.023 | 2.30 |
| TMEM156 | transmembrane protein 156 | NM_024943.1 | 0.035 | 2.30 |
| PATE2 | prostate and testis expressed 2 | NM_212555.1 | 0.023 | 2.29 |
| SNAPC1* | small nuclear RNA activating complex, polypeptide 1, 43kDa | NM_003082.2 | 0.023 | 2.29 |
| PTGR2* | prostaglandin reductase 2 | NM_152444.1 | 0.027 | 2.29 |
| GNB4 | G protein subunit beta 4 | NM_021629.2 | 0.030 | 2.27 |
| ZNF320* | zinc finger protein 320 | NM_207333.2 | 0.037 | 2.26 |
| EIF2AK4 | eukaryotic translation initiation factor 2 alpha kinase 4 | NM_001013703.2 | 0.021 | 2.26 |
| DENR* | density-regulated protein | NM_003677.3 | 0.021 | 2.26 |
| PATE1 | prostate and testis expressed 1 | NM_138294.2 | 0.027 | 2.24 |
| MEP1A | meprin A subuint alpha | NM_005588.2 | 0.026 | 2.24 |
| NOL4* | nucleolar protein 4 | NM_003787.1 | 0.026 | 2.24 |
| TMEM69* | transmembrane protein 69 | NM_016486.3 | 0.022 | 2.23 |
| RN7SK | RNA, 7SK small nuclear | NR_001445.1 | 0.021 | 2.22 |
| STAG3L2 | stromal antigen 3-like 2 | NM_001025202.2 | 0.018 | 2.22 |
| NEDD4L* | neural precursor cell expressed, developmentally down-regulated 4-like | NM_015277.3 | 0.027 | 2.21 |
| MGC26718 | similar to ankyrin repeat domain 20A | NM_001029999.2 | 0.043 | 2.21 |
| RNF150 | ring finger protein 150 | NM_020724.1 | 0.041 | 2.21 |
| FAM40B | family with sequence similarity 40, member B | NM_020704.1 | 0.023 | 2.21 |
| PROM1 | prominin 1 | NM_006017.1 | 0.032 | 2.21 |
| COX6BP1 | cytochrome c oxidase subunit VIb pseudogene 1 | NR_002210.1 | 0.031 | 2.21 |
| FCAR* | Fc fragment of IgA | NM_133279.1 | 0.022 | 2.19 |
| SYNJ2BP* | synaptojanin 2 binding protein | NM_018373.1 | 0.027 | 2.19 |
| RFX4 | regulatory factor X4 | NM_002920.3 | 0.046 | 2.19 |
| IL1RAPL1 | interleukin 1 receptor accessory protein-like 1 | NM_014271.2 | 0.037 | 2.18 |
| BCYRN1 | brain cytoplasmic RNA 1 | NR_001568.1 | 0.019 | 2.17 |
| MMAB* | metabolism of cobalamin associated B | NM_052845.2 | 0.026 | 2.17 |
| PDE7A* | phosphodiesterase 7A | NM_002604.1 | 0.021 | 2.17 |
| EVI5 | ecotropic viral integration site 5 | NM_005665.4 | 0.027 | 2.17 |
| ENHO | energy homeostasis associated | NM_198573.2 | 0.026 | 2.16 |
| L2HGDH | L-2-hydroxyglutarate dehydrogenase | NM_024884.1 | 0.031 | 2.16 |
| FAM104B* | family with sequence similarity 104, member B | NM_138362.2 | 0.036 | 2.16 |
| RAXL1 | retina and anterior neural fold homeobox like 1 | NM_032753.2 | 0.026 | 2.16 |
| LEP | leptin | NM_000230.1 | 0.021 | 2.16 |
| SIGLEC6 | sialic acid binding Ig-like lectin 6 | NM_198845.1 | 0.041 | 2.16 |
| GPX8* | glutathione peroxidase 8 | NM_001008397.2 | 0.046 | 2.16 |
| DUSP8 | dual specificity phosphatase 8 | NM_004420.2 | 0.021 | 2.15 |
| BLZF1* | basic leucine zipper nuclear factor 1 | NM_003666.2 | 0.020 | 2.15 |
| SNORD114-3 | small nucleolar RNA, C/D box 114-3 | NR_003195.1 | 0.029 | 2.14 |
| AGMAT* | agmatine ureohydrolase | NM_024758.3 | 0.032 | 2.14 |
| PLIN5* | perilipin 5 | NM_001013706.2 | 0.026 | 2.13 |
| FCF1* | FCF1 rRNA-processing protein | NM_015962.4 | 0.032 | 2.13 |
| HNRNPU* | heterogeneous nuclear ribonucleoprotein U | NM_004501.3 | 0.018 | 2.12 |
| ZNF577 | zinc finger protein 577 | NM_032679.1 | 0.022 | 2.12 |
| CRYBA2 | crystallin, beta A2 | NM_057093.1 | 0.031 | 2.12 |
| ANKRD38 | ankyrin repeat domain 38 | NM_181712.3 | 0.039 | 2.11 |
| STOX2* | storkhead box 2 | NM_020225.1 | 0.036 | 2.11 |
| IGFL3 | IGF-like family member 3 | NM_207393.1 | 0.027 | 2.11 |
| AGBL4 | ATP/GTP binding protein-like 4 | NM_032785.1 | 0.027 | 2.11 |
| UGT2B28* | UDP glucuronosyltransferase family 2 member B28 | NM_053039.1 | 0.038 | 2.11 |
| UCA1 | urothelial cancer associated 1 | NR_015379.2 | 0.024 | 2.11 |
| C21orf81 | chromosome 21 open reading frame 81 | NM_153750.1 | 0.020 | 2.09 |
| PDE7B | phosphodiesterase 7B | NM_018945.3 | 0.041 | 2.08 |
| VPS41* | vacuolar protein sorting 41 homolog | NM_014396.3 | 0.025 | 2.08 |
| ZNF500* | zinc finger protein 500 | NM_021646.1 | 0.018 | 2.07 |
| ZNF483* | zinc finger protein 483 | NM_001007169.1 | 0.021 | 2.06 |
| CLDN14 | claudin 14 | NM_012130.2 | 0.035 | 2.06 |
| NOL10* | nucleolar protein 10 | NM_024894.1 | 0.042 | 2.06 |
| AMOTL2 | angiomotin like 2 | NM_016201.2 | 0.031 | 2.06 |
| TTPAL* | tocopherol (alpha) transfer protein-like | NM_001039199.1 | 0.018 | 2.05 |
| RNF165 | ring finger protein 165 | NM_152470.2 | 0.039 | 2.05 |
| PARVB* | parvin beta, transcript variant 1 | NM_001003828.1 | 0.036 | 2.05 |
| CRYZL1* | crystallin, zeta (quinone reductase)-like 1 | NM_145311.1 | 0.025 | 2.05 |
| ZNF790 | zinc finger protein 790 | NM_206894.2 | 0.044 | 2.04 |
| COL8A1 | collagen, type VIII, alpha 1 | NM_020351.2 | 0.038 | 2.04 |
| PACRGL* | PARK2 co-regulated-like, transcript variant 1 | NM_145048.3 | 0.028 | 2.04 |
| NEK8 | NIMA (never in mitosis gene a)- related kinase 8 | NM_178170.2 | 0.037 | 2.04 |
| IRX3 | iroquois homeobox 3 | NM_024336.1 | 0.043 | 2.03 |
| ZNF563 | zinc finger protein 563 | NM_145276.1 | 0.041 | 2.03 |
| ZNF786* | zinc finger protein 786 | NM_152411.2 | 0.023 | 2.03 |
| KCNH2* | potassium voltage-gated channel subfamily H member 2 | NM_172056.1 | 0.025 | 2.03 |
| CAPS2 | calcyphosine 2 | NM_032606.3 | 0.029 | 2.03 |
| MAGEA10 | melanoma antigen family A, 10 | NM_021048.3 | 0.040 | 2.03 |
| ICA1* | islet cell autoantigen 1, 69kDa | NM_022308.1 | 0.022 | 2.03 |
| CHST12 | carbohydrate sulfotransferase 12 | NM_018641.3 | 0.037 | 2.02 |
| KLHL34 | kelch-like 34 | NM_153270.1 | 0.043 | 2.02 |
| PDP2 | pyruvate dehyrogenase phosphatase catalytic subunit 2 | NM_020786.1 | 0.040 | 2.02 |
| FZD3 | frizzled homolog 3 | NM_017412.2 | 0.018 | 2.02 |
| ZKSCAN1 | zinc finger with KRAB and SCAN domains 1 | NM_003439.1 | 0.031 | 2.02 |
| KLHL5* | kelch-like 5 | NM_001007075.1 | 0.028 | 2.01 |
| UGT2B17 | UDP glucuronosyltransferase family 2 member B17 | NM_001077.2 | 0.026 | 2.01 |
|  |  |  |  |  |
| **Downregulation** |  |  |  |  |
| HLA-DRB1* | major histocompatibility complex, class II, DR beta 1 | NM_002124.1 | 0.018 | -4.65 |
| FABP4* | fatty acid binding protein 4 | NM_001442.1 | 0.017 | -3.91 |
| GPNMB | glycoprotein nmb | NM_001005340.1 | 0.014 | -3.81 |
| HLA-DRB3 | major histocompatibility complex, class II, DR beta 3 | NM_022555.3 | 0.014 | -3.79 |
| SCD* | stearoyl-CoA desaturase | NM_005063.4 | 0.014 | -3.62 |
| APOE* | apolipoprotein E | NM_000041.2 | 0.014 | -3.62 |
| LIPA* | lipase A, lysosomal acid type | NM_000235.2 | 0.014 | -3.54 |
| IFI27* | interferon, alpha-inducible protein 27 | NM_005532.3 | 0.014 | -3.42 |
| PPARG* | peroxisome proliferator-activated receptor gamma | NM_015869.4 | 0.014 | -3.30 |
| FAM82A2 | family with sequence similarity 82, member A2 | NM_018145.1 | 0.014 | -3.29 |
| PLD3* | phospholipase D family, member 3 | NM_001031696.1 | 0.014 | -3.28 |
| SLCO2B1* | solute carrier organic anion transporter family, member 2B1 | NM_007256.2 | 0.015 | -3.25 |
| CCL18* | chemokine (C-C motif) ligand 18 | NM_002988.2 | 0.016 | -3.12 |
| LYZ* | lysozyme | NM_000239.1 | 0.014 | -3.11 |
| CPVL* | carboxypeptidase vitellogenic like | NM_031311.3 | 0.015 | -3.10 |
| C1QB* | complement C1q B chain | NM_000491.3 | 0.018 | -3.08 |
| PCOLCE2* | procollagen C-endopeptidase enhancer 2 | NM_013363.2 | 0.014 | -3.08 |
| MGST3* | microsomal glutathione S-transferase 3 | NM_004528.2 | 0.014 | -3.07 |
| C1QC* | complement C1q C chain | NM_172369.2 | 0.016 | -2.99 |
| ACP5* | acid phosphatase 5, tartrate resistant | NM_001611.2 | 0.014 | -2.96 |
| FUCA1* | alpha-L-fucosidase 1 | NM_000147.3 | 0.014 | -2.92 |
| ITGB5* | integrin, beta 5 | NM_002213.3 | 0.014 | -2.87 |
| FABP5* | fatty acid binding protein 5 | NM_001444.1 | 0.014 | -2.86 |
| CTSC* | cathepsin C | NM_001814.2 | 0.014 | -2.84 |
| MS4A7* | membrane spanning 4-domains A7 | NM_206938.1 | 0.014 | -2.82 |
| DAB2* | DAB adaptor protein 2 | NM_001343.2 | 0.014 | -2.80 |
| ALDH2* | aldehyde dehydrogenase 2 family member | NM_000690.2 | 0.018 | -2.80 |
| CD36* | CD36 molecule | NM_000072.2 | 0.016 | -2.75 |
| SCARB2* | scavenger receptor class B member 2 | NM_005506.2 | 0.014 | -2.71 |
| ABCG1* | ATP-binding cassette, sub-family G, member 1 | NM_016818.2 | 0.019 | -2.71 |
| NUPR1* | nuclear protein, transcriptional regulator, 1 | NM_001042483.1 | 0.014 | -2.71 |
| COMT* | catechol-O-methyltransferase | NM_007310.1 | 0.014 | -2.70 |
| APOC1* | apolipoprotein C-I | NM_001645.3 | 0.017 | -2.69 |
| ALDH1A1* | aldehyde dehydrogenase 1 family, member A1 | NM_000689.3 | 0.014 | -2.68 |
| VEGFB* | vascular endothelial growth factor B | NM_003377.3 | 0.017 | -2.63 |
| MDH1* | malate dehydrogenase 1 | NM_005917.2 | 0.014 | -2.63 |
| GLB1* | galactosidase beta 1 | NM_001079811.1 | 0.017 | -2.63 |
| SIDT2* | SID1 transmembrane family, member 2 | NM_001040455.1 | 0.018 | -2.62 |
| CTSZ* | cathepsin Z | NM_001336.2 | 0.017 | -2.62 |
| FCGR1B* | Fc fragment of IgG, high affinity Ib, receptor (CD64) | NM_001017986.1 | 0.017 | -2.60 |
| LY86* | lymphocyte antigen 86 | NM_004271.3 | 0.014 | -2.59 |
| SCPEP1* | serine carboxypeptidase 1 | NM_021626.1 | 0.014 | -2.58 |
| CXCL10* | C-X-C motif chemokine ligand 10 | NM_001565.2 | 0.022 | -2.58 |
| PRNP* | prion protein | NM_001080121.1 | 0.014 | -2.57 |
| TSPAN4* | tetraspanin 4 | NM_001025235.1 | 0.016 | -2.56 |
| TUBA1C* | tubulin, alpha 1c | NM_032704.2 | 0.018 | -2.55 |
| ANKRD33* | ankyrin repeat domain 33 | NM_182608.2 | 0.015 | -2.55 |
| SERPING1* | serpin family G member 1 | NM_001032295.1 | 0.022 | -2.53 |
| CECR1* | cat eye syndrome chromosome region, candidate 1 | NM_177405.1 | 0.017 | -2.52 |
| RPL26 | ribosomal protein L26 | NM_000987.3 | 0.016 | -2.52 |
| LAP3* | leucine aminopeptidase 3 | NM_015907.2 | 0.015 | -2.51 |
| AKR1C3* | aldo-keto reductase family 1, member C3 | NM_003739.4 | 0.025 | -2.49 |
| LPL | lipoprotein lipase | NM_000237.2 | 0.014 | -2.49 |
| NDUFAF3* | NADH:ubiquinone oxidoreductase complex assembly factor 3 | NM_199069.1 | 0.018 | -2.48 |
| CXCL9* | C-X-C motif chemokine ligand 9 | NM_002416.1 | 0.036 | -2.48 |
| C2orf28 | chromosome 2 open reading frame 28 | NM_080592.2 | 0.021 | -2.47 |
| UQCRQ* | ubiquinol-cytochrome c reductase complex III subunit VII | NM_014402.4 | 0.016 | -2.47 |
| TMEM14C* | transmembrane protein 14C | NM_016462.2 | 0.016 | -2.46 |
| C14orf173 | chromosome 14 open reading frame 173 | NM_022489.2 | 0.020 | -2.45 |
| NDUFA4* | NDUFA4 mitochondrial complex associated | NM_002489.2 | 0.022 | -2.44 |
| DNASE2* | deoxyribonuclease 2, lysosomal | NM_001375.2 | 0.014 | -2.44 |
| SPRED1* | sprouty related EVH1 domain containing 1 | NM_152594.1 | 0.017 | -2.44 |
| FAM96A* | family with sequence similarity 96, member A | NM_032231.4 | 0.018 | -2.42 |
| RARRES1* | retinoic acid receptor responder 1 | NM_206963.1 | 0.014 | -2.42 |
| PRCP* | prolylcarboxypeptidase | NM_005040.2 | 0.021 | -2.41 |
| MS4A4A* | membrane spanning 4-domains A4A | NM_148975.1 | 0.020 | -2.40 |
| DPYSL2* | dihydropyrimidinase like 2 | NM_001386.4 | 0.015 | -2.40 |
| TMED3* | transmembrane emp24 protein transport domain containing 3 | NM_007364.2 | 0.017 | -2.39 |
| P8 | p8 protein | NM_012385.1 | 0.016 | -2.39 |
| HLA-DMB* | major histocompatibility complex, class II, DM beta | NM_002118.3 | 0.014 | -2.38 |
| STOM* | stomatin | NM_004099.4 | 0.017 | -2.37 |
| NDUFA3* | NADH:ubiquinone oxidoreductase subunit A3 | NM_004542.2 | 0.027 | -2.36 |
| NR1H3* | nuclear receptor subfamily 1, group H, member 3 | NM_005693.1 | 0.018 | -2.36 |
| TNS3* | tensin 3 | NM_022748.10 | 0.017 | -2.36 |
| C14orf156 | chromosome 14 open reading frame 156 | NM_031210.3 | 0.024 | -2.35 |
| EMILIN2* | elastin microfibril interfacer 2 | NM_032048.2 | 0.014 | -2.35 |
| COX5B* | cytochrome c oxidase subunit 5B | NM_001862.2 | 0.017 | -2.35 |
| ATOX1* | antioxidant 1 copper chaperone | NM_004045.3 | 0.017 | -2.34 |
| C6orf105 | chromosome 6 open reading frame 105 | NM_032744.1 | 0.017 | -2.34 |
| PRDX1* | peroxiredoxin 1 | NM_181696.1 | 0.014 | -2.34 |
| CCL23* | chemokine (C-C motif) ligand 23 | NM_145898.1 | 0.026 | -2.33 |
| ATP6AP2* | ATPase H+ transporting accessory protein 2 | NM_005765.2 | 0.014 | -2.32 |
| TUBB* | tubulin, beta | NM_178014.2 | 0.023 | -2.32 |
| ATP5PD | ATP synthase peripheral stalk subunit d | NM_006356.2 | 0.029 | -2.32 |
| TMED10P | transmembrane emp24-like trafficking protein 10 (yeast) pseudogene | NR_002807.1 | 0.018 | -2.31 |
| MLPH* | melanophilin | NM_001042467.1 | 0.015 | -2.31 |
| ANXA2* | annexin A2 | NM_001002857.1 | 0.014 | -2.31 |
| FPR3* | formyl peptide receptor 3 | NM_002030.3 | 0.025 | -2.30 |
| SHFM1 | split hand/foot malformation (ectrodactyly) type 1 | NM_006304.1 | 0.023 | -2.29 |
| DBI* | diazepam binding inhibitor, acyl-CoA binding protein | NM_001079863.1 | 0.014 | -2.28 |
| C11orf75 | chromosome 11 open reading frame 75 | NM_020179.1 | 0.024 | -2.27 |
| A2M* | alpha-2-macroglobulin | NM_000014.4 | 0.024 | -2.27 |
| SELS | selenoprotein S | NM_018445.4 | 0.014 | -2.27 |
| ATP5PF | ATP synthase peripheral stalk subunit F6 | NM_001003701.1 | 0.021 | -2.27 |
| MGST2* | microsomal glutathione S-transferase 2 | NM_002413.3 | 0.016 | -2.27 |
| NDUFS5* | NADH:ubiquinone oxidoreductase subunit S5 | NM_004552.1 | 0.022 | -2.27 |
| TMX1* | thioredoxin-related transmembrane protein 1 | NM_030755.4 | 0.017 | -2.27 |
| OAS2* | 2'-5'-oligoadenylate synthetase 2 | NM_016817.2 | 0.017 | -2.26 |
| RSL24D1 | ribosomal L24 domain containing 1 | NM_016304.2 | 0.021 | -2.26 |
| CLDN23* | claudin 23 | NM_194284.2 | 0.015 | -2.26 |
| PLTP* | phospholipid transfer protein | NM_182676.1 | 0.040 | -2.26 |
| LACTB | lactamase beta | NM_032857.2 | 0.014 | -2.25 |
| EPSTI1 | epithelial stromal interaction 1 | NM_033255.2 | 0.021 | -2.25 |
| C16orf61 | chromosome 16 open reading frame 61 | NM_020188.2 | 0.018 | -2.25 |
| SMPDL3A | sphingomyelin phosphodiesterase, acid-like 3A | NM_006714.2 | 0.014 | -2.25 |
| NDUFA12* | NADH:ubiquinone oxidoreductase subunit A12 | NM_018838.3 | 0.017 | -2.24 |
| CD74* | CD74 molecule | NM_001025159.1 | 0.041 | -2.24 |
| ATP5F1A | ATP synthase F1 subunit alpha | NM_004046.4 | 0.016 | -2.23 |
| C19orf10 | chromosome 19 open reading frame 10 | NM_019107.3 | 0.023 | -2.23 |
| PLA2G7 | phospholipase A2, group VII | NM_005084.2 | 0.019 | -2.22 |
| MAN2B2* | mannosidase, alpha, class 2B, member 2 | NM_015274.1 | 0.018 | -2.22 |
| COLEC12* | collectin sub-family member 12 | NM_130386.1 | 0.019 | -2.22 |
| PPP1CC* | protein phosphatase 1, catalytic subunit, gamma | NM_002710.1 | 0.017 | -2.22 |
| CTSB* | cathepsin B | NM_147780.2 | 0.014 | -2.22 |
| PDXK* | pyridoxal kinase | NM_003681.4 | 0.016 | -2.22 |
| ATP5O* | ATP synthase peripheral stalk subunit OSCP | NM_001697.2 | 0.029 | -2.22 |
| COMMD6* | COMM domain containing 6 | NM_203497.2 | 0.019 | -2.21 |
| TGOLN2* | trans-golgi network protein 2 | NM_006464.2 | 0.017 | -2.21 |
| SEC11C* | SEC11 homolog C, signal peptidase complex subunit | NM_033280.2 | 0.022 | -2.21 |
| SPP1 | secreted phosphoprotein 1 | NM_001040058.1 | 0.020 | -2.20 |
| AADACL1 | arylacetamide deacetylase-like 1 | NM_020792.3 | 0.016 | -2.20 |
| ADAP2* | ArfGAP with dual PH domains 2 | NM_018404.2 | 0.016 | -2.20 |
| RGS1 | regulator of G-protein signaling 1 | NM_002922.3 | 0.016 | -2.20 |
| SH3BGRL* | SH3 domain binding glutamic acid-rich protein like | NM_003022.1 | 0.014 | -2.20 |
| RPLP0* | ribosomal protein lateral stalk subunit P0 | NM_001002.3 | 0.014 | -2.20 |
| VSIG4* | V-set and immunoglobulin domain containing 4 | NM_007268.2 | 0.015 | -2.19 |
| COMMD3* | COMM domain containing 3 | NM_012071.2 | 0.017 | -2.19 |
| SUMF2* | sulfatase modifying factor 2 | NM_001042470.1 | 0.018 | -2.19 |
| LGMN | legumain | NM_001008530.1 | 0.031 | -2.19 |
| TRAM1* | translocation associated membrane protein 1 | NM_014294.4 | 0.018 | -2.19 |
| ACOT7* | acyl-CoA thioesterase 7 | NM_007274.3 | 0.017 | -2.19 |
| SERPINB6* | serpin family B member 6 | NM_004568.4 | 0.018 | -2.19 |
| DEGS1* | delta 4-desaturase, sphingolipid 1 | NM_003676.2 | 0.014 | -2.18 |
| KYNU | kynureninase | NM_003937.2 | 0.022 | -2.18 |
| ROBLD3 | roadblock domain containing 3 | NM_014017.2 | 0.018 | -2.18 |
| HINT1* | histidine triad nucleotide binding protein 1 | NM_005340.3 | 0.029 | -2.17 |
| KLHDC8B* | kelch domain containing 8B | NM_173546.1 | 0.018 | -2.17 |
| TSPAN3* | tetraspanin 3 | NM_005724.4 | 0.021 | -2.17 |
| C1QA* | complement C1q A chain | NM_015991.1 | 0.017 | -2.17 |
| PSMA5* | proteasome 20S subunit alpha 5 | NM_002790.2 | 0.031 | -2.17 |
| HLA-DMA* | major histocompatibility complex, class II, DM alpha | NM_006120.2 | 0.015 | -2.17 |
| RPS5* | ribosomal protein S5 | NM_001009.3 | 0.019 | -2.17 |
| SEC11A* | SEC11 homolog A, signal peptidase complex subunit | NM_014300.2 | 0.017 | -2.17 |
| ACO1* | aconitase 1 | NM_002197.3 | 0.022 | -2.16 |
| HIBADH* | 3-hydroxyisobutyrate dehydrogenase | NM_152740.2 | 0.014 | -2.16 |
| ZMPSTE24* | zinc metallopeptidase STE24 | NM_005857.3 | 0.014 | -2.16 |
| HADH* | hydroxyacyl-Coenzyme A dehydrogenase | NM_005327.2 | 0.016 | -2.16 |
| GCHFR* | GTP cyclohydrolase I feedback regulator | NM_005258.2 | 0.019 | -2.16 |
| BRP44L | brain protein 44-like | NM_016098.1 | 0.022 | -2.16 |
| PSMC2* | proteasome 26S subunit, ATPase 2 | NM_002803.2 | 0.023 | -2.15 |
| MS4A6A* | membrane spanning 4-domains A6A | NM_022349.2 | 0.017 | -2.15 |
| COX17* | cytochrome c oxidase copper chaperone COX17 | NM_005694.1 | 0.023 | -2.15 |
| CA2 | carbonic anhydrase II | NM_000067.1 | 0.017 | -2.15 |
| PEPD* | peptidase D | NM_000285.2 | 0.022 | -2.15 |
| TOMM7 | translocase of outer mitochondrial membrane 7 | NM_019059.2 | 0.023 | -2.15 |
| UQCRH* | ubiquinol-cytochrome c reductase hinge protein | NM_006004.2 | 0.017 | -2.15 |
| PEA15 | phosphoprotein enriched in astrocytes 15 | NM_003768.2 | 0.014 | -2.15 |
| AGRP* | agouti related neuropeptide | NM_007316.1 | 0.026 | -2.14 |
| PIGY | phosphatidylinositol glycan anchor biosynthesis, class Y | NM_001042616.1 | 0.023 | -2.14 |
| VAMP8* | vesicle associated membrane protein 8 | NM_003761.2 | 0.018 | -2.14 |
| NAT5 | N-acetyltransferase 5 | NM_181528.2 | 0.015 | -2.14 |
| HNMT* | histamine N-methyltransferase | NM_001024074.1 | 0.014 | -2.13 |
| CES1 | carboxylesterase 1 | NM_001266.4 | 0.029 | -2.13 |
| AKR1A1* | aldo-keto reductase family 1, member A1 | NM_006066.2 | 0.034 | -2.13 |
| HDDC2* | HD domain containing 2 | NM_016063.2 | 0.021 | -2.13 |
| AP1B1* | adaptor-related protein complex 1, subunit beta 1 | NM_145730.1 | 0.014 | -2.13 |
| S100A4* | S100 calcium binding protein A4 | NM_019554.2 | 0.026 | -2.13 |
| BLVRA* | biliverdin reductase A | NM_000712.3 | 0.016 | -2.13 |
| REEP5* | receptor accessory protein 5 | NM_005669.4 | 0.025 | -2.12 |
| DDB1* | damage-specific DNA binding protein 1 | NM_001923.3 | 0.017 | -2.12 |
| PNPO* | pyridoxamine 5'-phosphate oxidase | NM_018129.2 | 0.016 | -2.12 |
| TEX2 | testis expressed 2 | NM_018469.3 | 0.017 | -2.12 |
| LDHB* | lactate dehydrogenase B | NM_002300.4 | 0.026 | -2.12 |
| TGM2* | transglutaminase 2 | NM_004613.2 | 0.045 | -2.12 |
| EPAS1* | endothelial PAS domain protein 1 | NM_001430.3 | 0.017 | -2.12 |
| SLC47A1* | solute carrier family 47 member 1 | NM_018242.2 | 0.021 | -2.11 |
| SRP14* | signal recognition particle 14 | NM_003134.4 | 0.014 | -2.11 |
| SLC27A3* | solute carrier family 27 member 3 | NM_024330.1 | 0.018 | -2.11 |
| SETD3* | SET domain containing 3 | NM_032233.2 | 0.021 | -2.11 |
| TIMP2* | TIMP metallopeptidase inhibitor 2 | NM_003255.4 | 0.017 | -2.10 |
| PPT1* | palmitoyl-protein thioesterase 1 | NM_000310.2 | 0.017 | -2.10 |
| CTSH* | cathepsin H | NM_004390.2 | 0.014 | -2.10 |
| PTPMT1* | protein tyrosine phosphatase, mitochondrial 1 | NM_175732.1 | 0.016 | -2.10 |
| C16orf58* | chromosome 16 open reading frame 58 | NM_022744.1 | 0.016 | -2.10 |
| C1orf85 | chromosome 1 open reading frame 85 | NM_144580.1 | 0.021 | -2.10 |
| SNRPF* | small nuclear ribonucleoprotein polypeptide F | NM_003095.2 | 0.028 | -2.10 |
| IDH1* | isocitrate dehydrogenase 1 | NM_005896.2 | 0.016 | -2.10 |
| CTSL1 | cathepsin L1 | NM_001912.3 | 0.018 | -2.10 |
| FBP1* | fructose-1,6-bisphosphatase 1 | NM_000507.2 | 0.021 | -2.10 |
| SLC25A43* | solute carrier family 25 member 43 | NM_145305.1 | 0.014 | -2.10 |
| ACAT1* | acetyl-Coenzyme A acetyltransferase 1 | NM_000019.2 | 0.016 | -2.10 |
| CYB5A* | cytochrome b5 type A | NM_001914.2 | 0.021 | -2.09 |
| STARD7* | START domain containing 7 | NM_020151.2 | 0.039 | -2.09 |
| IFI44 | interferon-induced protein 44 | NM_006417.3 | 0.017 | -2.09 |
| SOD1* | superoxide dismutase 1 | NM_000454.4 | 0.020 | -2.09 |
| CD163 | CD163 molecule | NM_203416.1 | 0.049 | -2.09 |
| COQ2* | coenzyme Q2 homolog, prenyltransferase | NM_015697.6 | 0.025 | -2.09 |
| LAMP2* | lysosomal-associated membrane protein 2 | NM_002294.1 | 0.014 | -2.09 |
| EEF1B2* | eukaryotic translation elongation factor 1 beta 2 | NM_001959.2 | 0.016 | -2.09 |
| CLIC4* | chloride intracellular channel 4 | NM_013943.1 | 0.021 | -2.09 |
| CTSK | cathepsin K | NM_000396.2 | 0.021 | -2.09 |
| CITED2* | Cbp/p300-interacting transactivator with Glu/Asp-rich carboxy-terminal domain 2 | NM_006079.3 | 0.036 | -2.08 |
| PSMB6* | proteasome 20S subunit beta 6 | NM_002798.1 | 0.016 | -2.08 |
| AARS* | alanyl-tRNA synthetase | NM_001605.2 | 0.017 | -2.08 |
| AXL* | AXL receptor tyrosine kinase | NM_021913.2 | 0.018 | -2.08 |
| H2AFY | H2A histone family, member Y | NM_138609.2 | 0.030 | -2.08 |
| GRN* | granulin | NM_002087.2 | 0.014 | -2.08 |
| SNRPB2* | small nuclear ribonucleoprotein polypeptide B2 | NM_198220.1 | 0.026 | -2.07 |
| CCDC109B | coiled-coil domain containing 109B | NM_017918.3 | 0.018 | -2.07 |
| HLA-DRB4 | major histocompatibility complex, class II, DR beta 4 | NM_021983.4 | 0.016 | -2.07 |
| TCEAL4* | transcription elongation factor A like 4 | NM_001006937.1 | 0.014 | -2.07 |
| ACP2* | acid phosphatase 2 | NM_001610.1 | 0.041 | -2.07 |
| SLC38A6* | solute carrier family 38 member 6 | NM_153811.1 | 0.016 | -2.07 |
| GLDN | gliomedin | NM_181789.2 | 0.041 | -2.07 |
| ENPP4* | ectonucleotide pyrophosphatase/phosphodiesterase 4 | NM_014936.3 | 0.018 | -2.07 |
| ADCK2* | aarF domain containing kinase 2 | NM_052853.3 | 0.017 | -2.07 |
| M6PR | mannose-6-phosphate receptor | NM_002355.2 | 0.017 | -2.07 |
| PMP22 | peripheral myelin protein 22 | NM_153321.1 | 0.027 | -2.07 |
| C19orf70* | chromosome 19 open reading frame 70 | NM_205767.1 | 0.022 | -2.07 |
| LGALS3BP* | lectin, galactoside-binding, soluble, 3 binding protein | NM_005567.2 | 0.031 | -2.06 |
| SNTB1* | syntrophin beta 1 | NM_021021.2 | 0.019 | -2.06 |
| RPS6* | ribosomal protein S6 | NM_001010.2 | 0.018 | -2.06 |
| ACVRL1* | activin A receptor type II-like 1 | NM_000020.2 | 0.016 | -2.06 |
| NDUFB5* | NADH:ubiquinone oxidoreductase subunit B5 | NM_002492.2 | 0.014 | -2.05 |
| USO1* | USO1 vesicle transport factor | NM_003715.2 | 0.014 | -2.05 |
| LEPROTL1* | leptin receptor overlapping transcript-like 1 | NM_015344.1 | 0.021 | -2.05 |
| HNRNPAB* | heterogeneous nuclear ribonucleoprotein A/B | NM_004499.3 | 0.021 | -2.05 |
| ATP1B1* | ATPase, Na+/K+ transporting subunit beta 1 | NM_001677.3 | 0.024 | -2.05 |
| CD9* | CD9 molecule | NM_001769.2 | 0.029 | -2.05 |
| MARCO* | macrophage receptor with collagenous structure | NM_006770.3 | 0.040 | -2.04 |
| Sep-02 | septin 2 | NM_001008491.1 | 0.026 | -2.04 |
| ARHGAP17* | Rho GTPase activating protein 17 | NM_018054.4 | 0.022 | -2.04 |
| CRTAP* | cartilage associated protein | NM_006371.3 | 0.016 | -2.04 |
| TSPO* | translocator protein | NM_000714.4 | 0.027 | -2.04 |
| NCKAP1L* | NCK-associated protein 1-like | NM_005337.4 | 0.025 | -2.03 |
| HLA-DPA1* | major histocompatibility complex, class II, DP alpha 1 | NM_033554.2 | 0.014 | -2.03 |
| ARSB* | arylsulfatase B | NM_000046.2 | 0.014 | -2.03 |
| JMJD8* | jumonji domain containing 8 | NM_001005920.2 | 0.020 | -2.03 |
| CAT* | catalase | NM_001752.2 | 0.033 | -2.03 |
| COX8A* | cytochrome c oxidase subunit 8A | NM_004074.2 | 0.018 | -2.03 |
| SDHD* | succinate dehydrogenase complex subunit D | NM_003002.1 | 0.023 | -2.02 |
| HBXIP | hepatitis B virus x interacting protein | NM_006402.2 | 0.038 | -2.02 |
| XAF1 | XIAP associated factor 1 | NM_199139.1 | 0.025 | -2.02 |
| RND3 | Rho family GTPase 3 | NM_005168.3 | 0.026 | -2.02 |
| NRP1* | neuropilin 1 | NM_003873.4 | 0.016 | -2.02 |
| FMNL2* | formin-like 2 | NM_052905.3 | 0.018 | -2.02 |
| CCT8* | chaperonin containing TCP1 subunit 8 | NM_006585.2 | 0.042 | -2.02 |
| HEXB* | hexosaminidase subunit beta | NM_000521.2 | 0.014 | -2.02 |
| CXXC5* | CXXC finger 5 | NM_016463.5 | 0.026 | -2.02 |
| HLA-DRB6* | major histocompatibility complex, class II, DR beta 6 | NR_001298.1 | 0.014 | -2.02 |
| ATP6V1H* | ATPase H+ transporting V1 subunit H | NM_213619.1 | 0.014 | -2.02 |
| RAB9A | RAB9A, member RAS oncogene family | NM_004251.3 | 0.018 | -2.01 |
| PTPLAD1 | protein tyrosine phosphatase-like A domain containing 1 | NM_016395.2 | 0.016 | -2.01 |
| GLG1* | golgi apparatus protein 1 | NM_012201.4 | 0.026 | -2.01 |
| GTPBP6 | GTP binding protein 6 | NM_012227.1 | 0.030 | -2.01 |
| DPP7* | dipeptidyl peptidase 7 | NM_013379.2 | 0.019 | -2.01 |
| CTNNA1* | catenin alpha 1 | NM_001903.2 | 0.026 | -2.01 |
| NENF* | neudesin neurotrophic factor | NM_013349.3 | 0.023 | -2.01 |
| IFI6* | interferon, alpha-inducible protein 6 | NM_022872.2 | 0.015 | -2.00 |
| PLBD1* | phospholipase B domain containing 1 | NM_024829.4 | 0.014 | -2.00 |
| DHRS4 | dehydrogenase/reductase 4 | NM_021004.2 | 0.021 | -2.00 |
| TUBA1A | tubulin, alpha 1a | NM_006009.2 | 0.024 | -2.00 |
| DYNLL1* | dynein light chain LC8-type 1 | NM_001037494.1 | 0.016 | -2.00 |

**Note**: *Overlapping genes with ECLIPSE data set (GSE22148)

**References**

1. Singh D, Fox SM, Tal-Singer R, et al. Induced sputum genes associated with spirometric and radiological disease severity in COPD ex-smokers. Thorax. 2011;66(6):489-95.
